# Supplementary material
Source: PubMed Central journal article supplement (PMC3221794)

Mass Spectrometric Characterization of 2-Amino-1-  
methyl-6-phenylimidazo[4,5-*b*]pyridine *N*-Oxidized  
Metabolites Bound at Cys<sup>34</sup> of Human Serum Albumin

*Lijuan Peng<sup>†</sup> and Robert J. Turesky<sup>†,\*</sup>*

Division of Environmental Health Sciences, Wadsworth Center,

New York State Department of Health, Albany, New York 12201

## FIGURE LEGENDS

Figure S-1. Product ion mass spectra of A) HS-PhIP, B) H[<sup>34</sup>S]-PhIP and C) HS-[<sup>2</sup>H<sub>5</sub>]-PhIP.

Figure S-2. Reconstructed ion chromatograms of C\*PF (C-desamino-PhIP), C\*P (C-desamino-PhIP) and C-desamino-PhIP produced by pronase E digestion of NO<sub>2</sub>-PhIP-modified human SA (left panel) and corresponding product ion mass spectra (right panel).

Figure S-3. Full scan mass spectrum of the acid hydrolysis products of the synthetic LQQC\*PF (C-[S=O]-PhIP) sulfinamide. The protonated PhIP is observed at *m/z* 225.2 and the singly charged LQQC(SO<sub>2</sub>H)PF is observed at *m/z* 767.4.

Figure S-4. Product ion mass spectrum of C\*PF (C-[S=O]-PhIP).

Figure S-5. Comparison of trypsin/chymotrypsin digestion of NO-PhIP-modified human SA using different denaturing agents. The digestion efficiency was assessed through the measurement of the LQQC\*PF (C-[S=O]-PhIP) sulfinamide adduct by LC-ESI/MS/MS. The NO-PhIP-modified SA was preincubated with denaturing reagents for 1 h at 37 °C prior to enzymatic digestion. The SA samples in the CH<sub>3</sub>CN/NH<sub>4</sub>HCO<sub>3</sub> solvent mixtures were digested without dilution, whereas the SA samples in 6 M urea or 50% trifluoroethanol were diluted by 10-fold prior to enzyme digestion. Each bar graph represents the average and standard deviation of 3 experiments.

Figure S-1

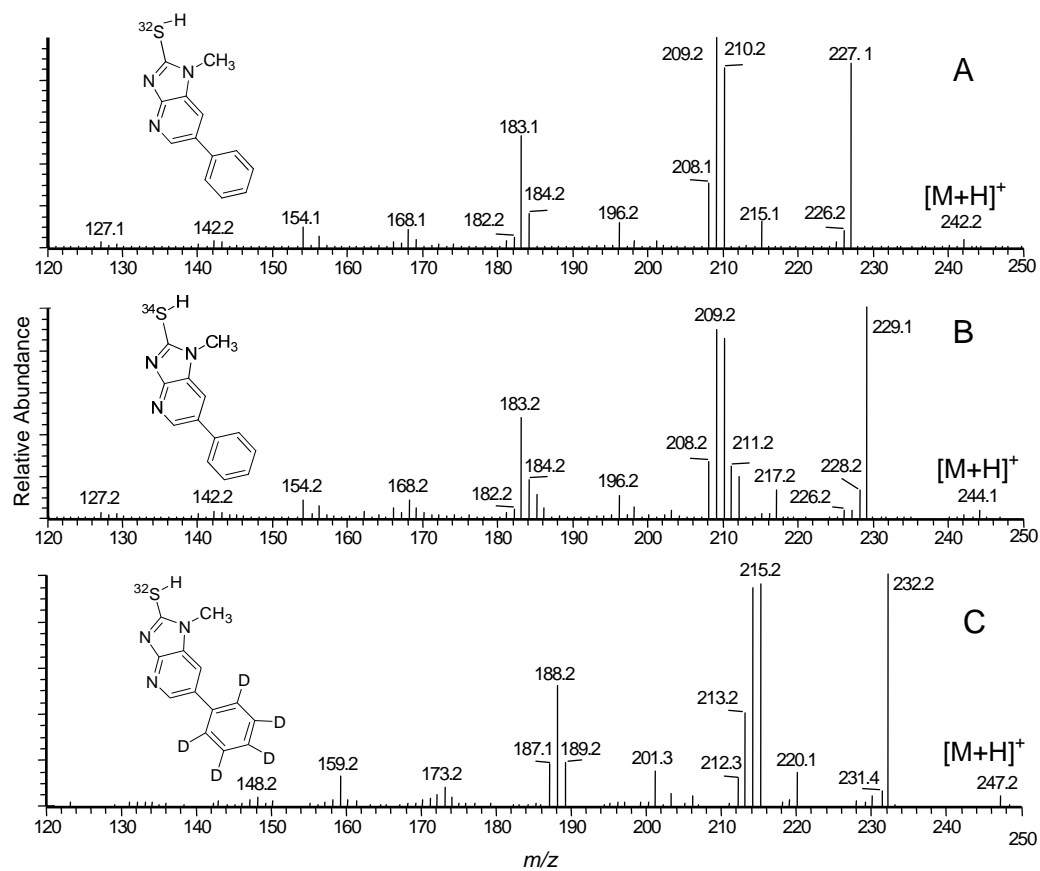

Figure S-2

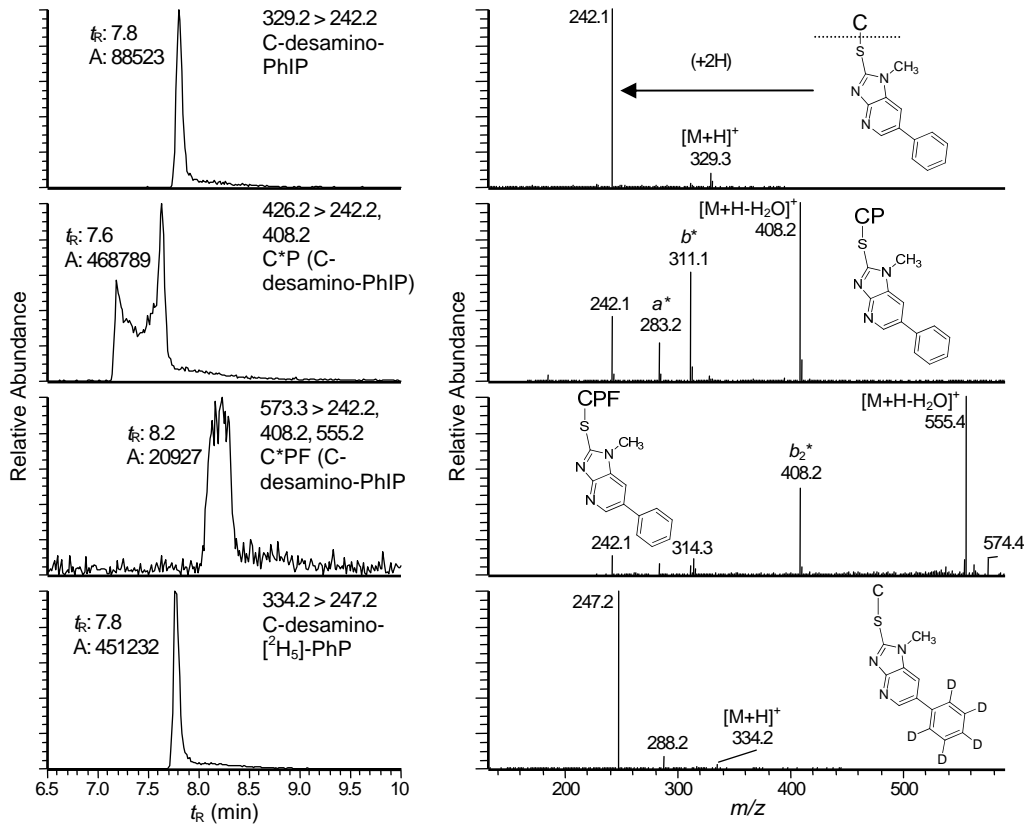

Figure S-3

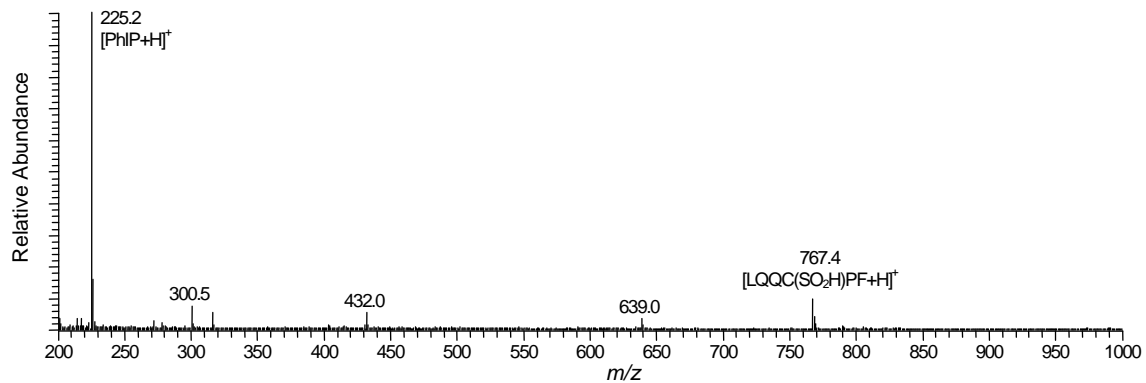

Figure S-4

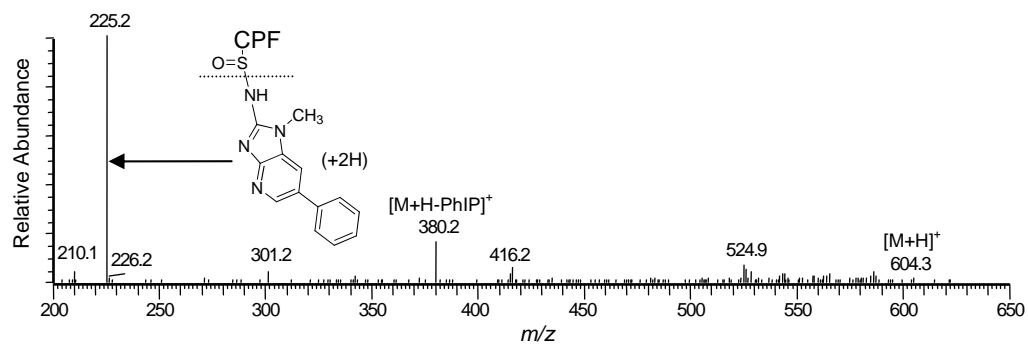

Figure S-5

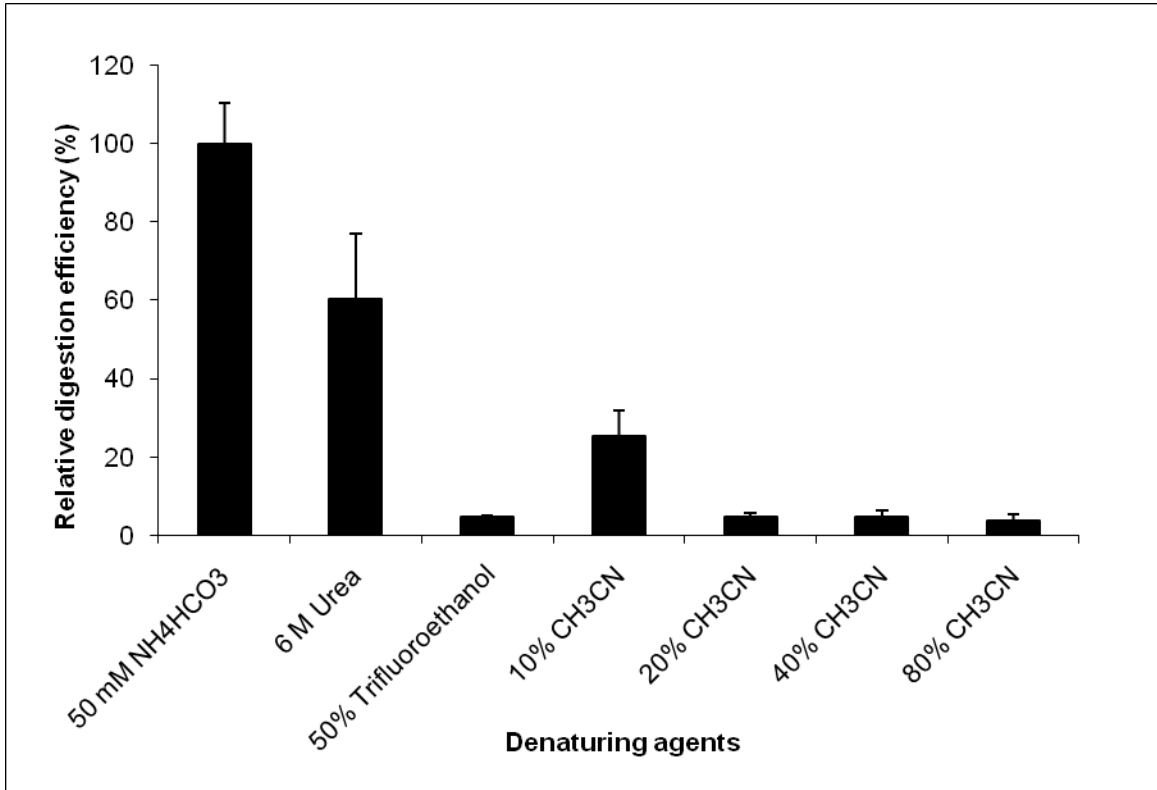

Supplement: NIHMS329592-supplement-1_si_001.pdf [file NIHMS329592-supplement-1_si_001.pdf]
